# Supplementary material for: Biochemical and Anatomical Investigation of Sesbania herbacea (Mill.) McVaugh Nodules Grown under Flooded and Non-Flooded Conditions
Source: MDPI journal article supplement (doi:10.3390/ijms20081824), 2019-04-12
Supplement: s1 [file s1]

**Supplemental Table 1.** Particulars of the metabolites identified by LC-MS and IC-MS in flooded and non-flooded nodules.

| #  | Time  | p value | Method (metabolites) | Name          | Reference  |
|----|-------|---------|----------------------|---------------|------------|
| 1  | 30.33 | 0.0139  | LC-MS (Secondary)    | Ononin        | MS and ref |
| 2  | 33.04 | 0.0209  | LC-MS (Secondary)    | Glycetein     | MS and ref |
| 3  | 45.29 | 0.0209  | LC-MS (Secondary)    | Formonetin    | MS and ref |
| 4  | 3.87  | 0.0833  | LC-MS (Primary)      | Aspartic Acid | Standard   |
| 5  | 5.42  | 0.1489  | LC-MS (Primary)      | Glutamic Acid | Standard   |
| 6  | 8.38  | 0.0209  | LC-MS (Primary)      | Asparagine    | Standard   |
| 7  | 9.04  | 0.0209  | LC-MS (Primary)      | Serine        | Standard   |
| 8  | 9.51  | 0.7728  | LC-MS (Primary)      | Histidine     | Standard   |
| 9  | 9.77  | 0.1489  | LC-MS (Primary)      | Glutamine     | Standard   |
| 10 | 13.35 | 0.0433  | LC-MS (Primary)      | Glycine       | Standard   |
| 11 | 15.75 | 0.0209  | LC-MS (Primary)      | Threonine     | Standard   |
| 12 | 27.26 | 0.0433  | LC-MS (Primary)      | L -Alanine    | Standard   |
| 13 | 31.11 | 0.0209  | LC-MS (Primary)      | GABA          | Standard   |
| 14 | 45.33 | 0.7726  | LC-MS (Primary)      | Tyrosine      | Standard   |
| 15 | 48.04 | 0.0433  | LC-MS (Primary)      | Valine        | Standard   |
| 16 | 53.49 | 0.0433  | LC-MS (Primary)      | Tryptophan    | Standard   |
| 17 | 54.27 | 0.0209  | LC-MS (Primary)      | Isoleucine    | Standard   |
| 18 | 56.19 | 0.1489  | LC-MS (Primary)      | Leucine       | Standard   |
|    |       |         |                      | Phenylalanine |            |
| 19 | 77.96 | 0.0433  | LC-MS (Primary)      | Lysine        | Standard   |
| 20 | 10.29 | 0.0209  | IC-MS (Primary)      | Glucose       | Standard   |
| 21 | 11.43 | 0.0209  | IC-MS (Primary)      | Sucrose       | Standard   |
| 22 | 12.15 | 0.2482  | IC-MS (Primary)      | Fructose      | Standard   |
| 23 | 13.40 | 0.1489  | IC-MS (Primary)      | Melibiose     | Standard   |
| 24 | 35.41 | 0.0209  | IC-MS (Primary)      | Maltose       | Standard   |

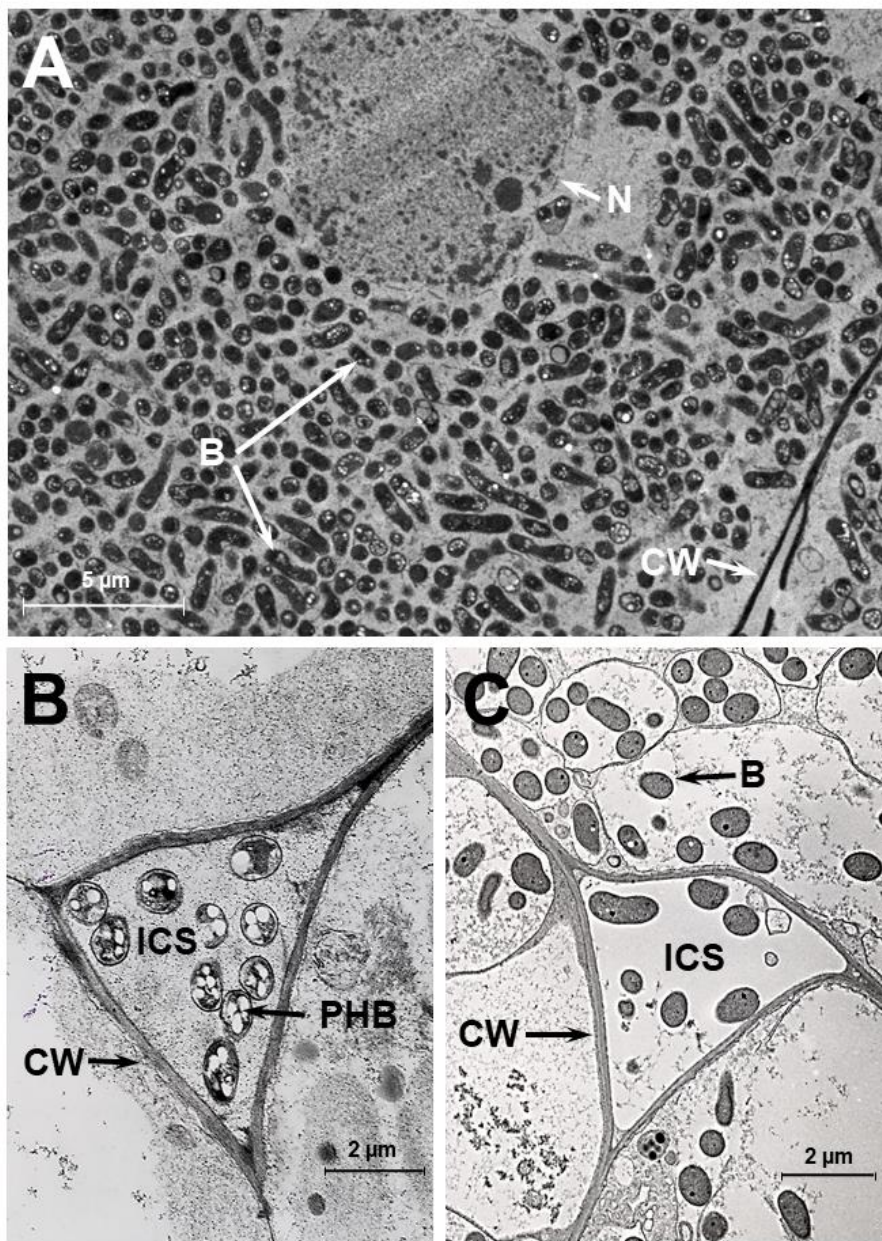

**Supplemental Figure 1.** Transmission electron micrographs of *Sesbania* nodules. A. Low magnification view of *Sesbania* flooded nodule cell harboring bacteroids with prominent polyhydroxybutyrate crystals. B. Rhizobia were also seen in the intercellular space. C. Electron micrograph of non-flooded *Sesbania* nodule cell reveal the presence of numerous bacteroids. Note the absence of polyhydroxybutyrate crystals in these bacteroids. B, bacteroid; CW, cell wall; ICS, inter cellular space; N, nucleus; PHB, polyhydroxybutyrate.

1A

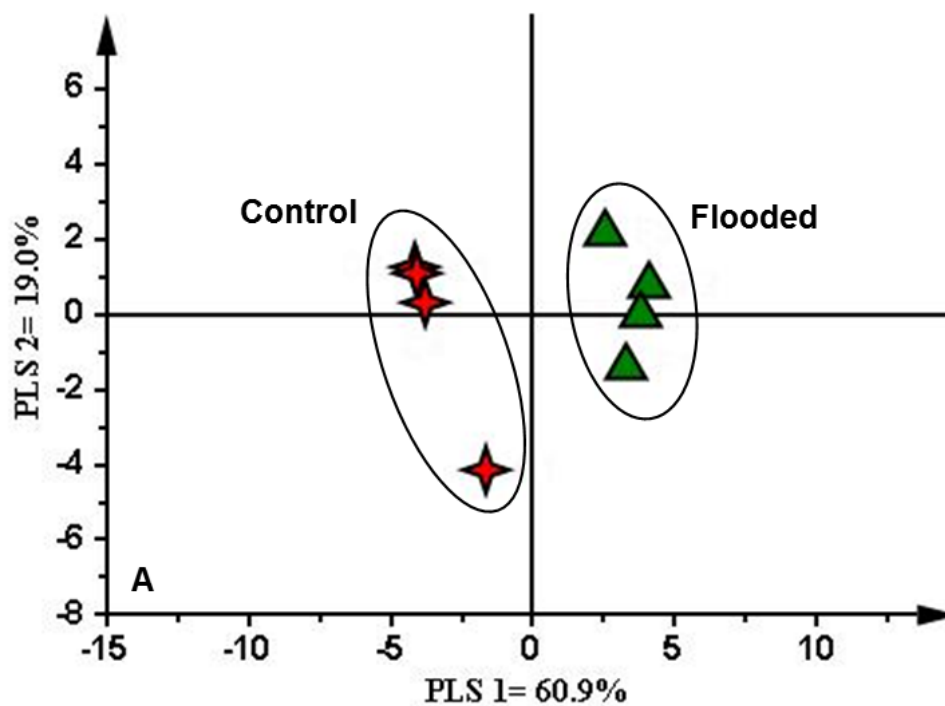

1B

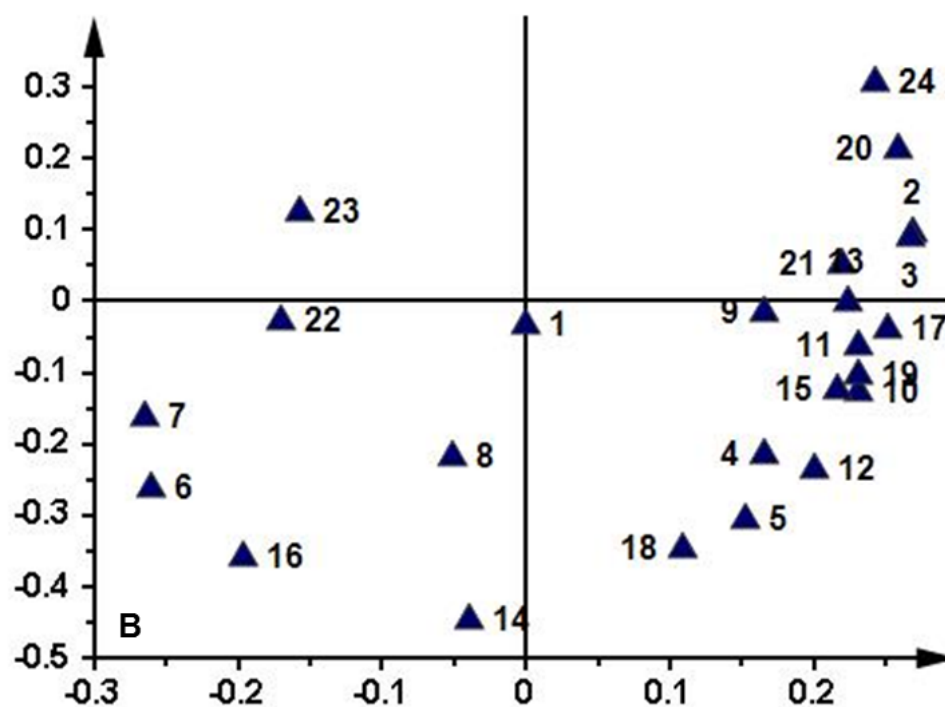

**Supplemental Figure 2.** Metabolic variation between non-flooded and flooded *Sesbania* nodules. (1A). PLS-DA score plot. (1B). PLS-DA loading plot. Metabolite # corresponds to those listed in Supplemental Table 1.
